# Supplementary material
Source: PubMed Central journal article supplement (PMC3923867)
Supplement: NIHMS517532-supplement-Supp_Figure_S1-S2_Table_S1-S2.pdf [file NIHMS517532-supplement-Supp_Figure_S1-S2_Table_S1-S2.pdf]

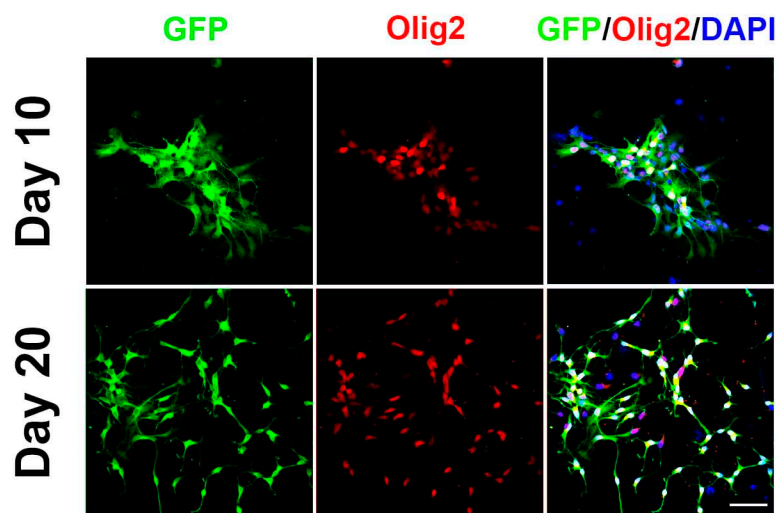

**A**

mESC-OPCs

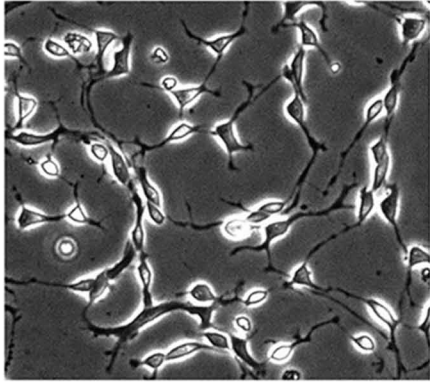

+ T3

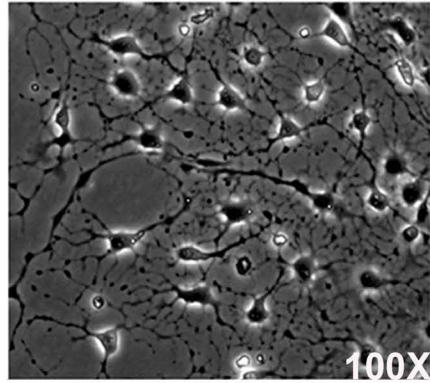**B**

mESC-OPCs

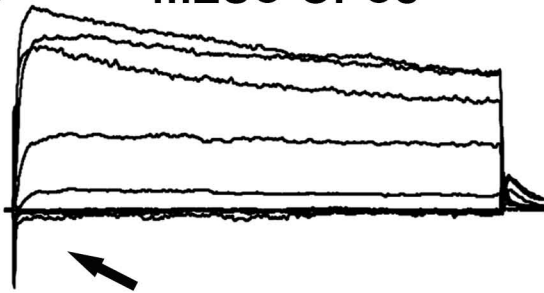

+ T3

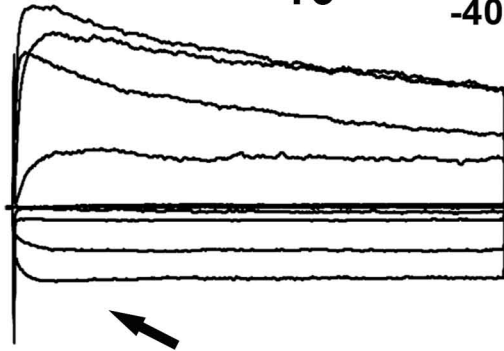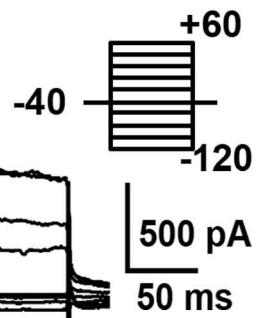



Supplementary table 1. Primers (annealing temperature 56 °C)

| Gene                          | Accession No.       | Forward sequence          | Reverse sequence          | Length (bp) |
|-------------------------------|---------------------|---------------------------|---------------------------|-------------|
| SCN1A (Na <sub>v</sub> 1.1)   | <u>NM_018733</u>    | TTCTTCAGATTAACACTTCAGGGGC | GCGCCTTTCAATAGCTGCAAG     | 206         |
| SCN2A1 ( Na <sub>v</sub> 1.2) | <u>NM_001099298</u> | ATGCGGGAAAATGCTATGAC      | TAACTTTCCACTACTCTACC      | 326         |
| SCN3A ( Na <sub>v</sub> 1.3)  | <u>NM_018732</u>    | GTAATTTGCAAATCCCTGTGGCC   | GCTTGTTCTCATCGTCAATGTCTTG | 312         |
| SCN4A ( Na <sub>v</sub> 1.4)  | <u>NM_133199</u>    | TTGGGGGAACGGGGCTTTGA      | GCTGGGGGACCTGGGCTCTTA     | 224         |
| SCN5A ( Na <sub>v</sub> 1.5)  | <u>NM_021544</u>    | TGTCCCTCCCTGGCACTCACTT    | TGCCCCTCCCTCCTTCCGTCTA    | 279         |
| SCN7A (Na <sub>x</sub> )      | <u>NM_009135</u>    | CCATGGCTGCGGGAGAC         | CATTTTGCCTTAAGCGGTAGC     | 240         |
| SCN8A (Na <sub>v</sub> 1.6)   | <u>NM_001077499</u> | GAAGAGTTTGCCTTTCATCTACGG  | AATCCCTGTGAATGTGTACTCCACA | 320         |
| SCN9A (Na <sub>v</sub> 1.7)   | <u>NM_018852</u>    | CCCTTGGATCAGAATCCGCA      | GGAATGTCTCCGTAGATGAAGGGT  | 307         |
| SCN10A (Na <sub>v</sub> 1.8)  | <u>NM_009134</u>    | AGAGATGGCACCAACCTACAG     | ACCCCTATGCGACAGTGC        | 302         |
| SCN11A (Na <sub>v</sub> 1.9)  | <u>NM_011887</u>    | GGAGGAGGAATGTGCCGCTGTC    | GTGAGTCCGCCGCTTGTTTCGC    | 238         |
| SCN1B (β1)                    | <u>NM_011322</u>    | ACGCTGCTGGCTCTCGTGGT      | ACAGGTCCTGCAGGTCCTTGGT    | 307         |
| SCN2B (β2)                    | <u>NM_001014761</u> | CTTCAACTCCTGCTACACCGTGA   | CCGCTCTGGGGGTACTTCTAGA    | 310         |
| SCN3B (β3)                    | <u>NM_153522</u>    | CTCGAAAGAATCAGAGGGGCTCA   | TTCATGGAATTGCCCTGCAC      | 200         |
| SCN4B (β4)                    | <u>NM_001013390</u> | ATCCTGCTGCCCTGCACCTT      | TGGAGGAAGATGGTGGCAGAGT    | 305         |
| Olig2                         | <u>NM_016967</u>    | GAAGCAGCAGCGGCTTCACA      | CCGTCCATGGCGATGTTGAG      | 304         |
| NG2                           | <u>NM_139001</u>    | GCTCTGTTCTTCGCCTTACAA     | AGTCTGACCTGGAGGCATCCTG    | 306         |



**Supplementary table 2. Primary antibodies**

| Antibody            | Isotype    | Dilution | Source                                       |
|---------------------|------------|----------|----------------------------------------------|
| NG2                 | Rabbit IgG | 1:200    | Millipore AB5320                             |
| A2B5                | Mouse IgM  | 1:200    | Millipore MAB312                             |
| Olig2               | Goat IgG   | 1:1000   | Phosphosolutions 1538                        |
| $\beta$ III-tubulin | Mouse IgG  | 1:500    | Millipore MAB1637                            |
| HB9 or MNR2         | Mouse IgG  | 1:50     | Developmental Studies Hybridoma Bank 81.5C10 |
| GFAP                | Mouse IgG  | 1:1000   | Millipore AB5804                             |
| MBP                 | Rat IgG    | 1:100    | Millipore MAB386                             |
| Anti-GFP            | Rabbit IgG | 1:1000   | Invitrogen A11122                            |
| Anti-GFP            | Goat IgG   | 1:1000   | Rockland 600-141-215                         |
